1 Title

2 Toward Capturing the Exposome: Exposure Biomarker Variability and Co-Exposure Patterns in  
3 the Shared Environment

4

5

6 Running title:

7 Exposome variability in the household setting

8

9 Ming Kei Chung,<sup>1</sup> Kurunthachalam Kannan,<sup>2</sup> Germaine M. Buck Louis,<sup>3</sup> and Chirag J. Patel<sup>1</sup>

10

11

12 <sup>1</sup>Department of Biomedical Informatics

13 Harvard Medical School

14 Harvard University

15 10 Shattuck Street

16 Boston, MA 02115

17

18 <sup>2</sup>Division of Environmental Health Sciences

19 Wadsworth Center, New York State Department of Health, and

20 Department of Environmental Health Sciences

21 The University at Albany

22 Albany, New York 12201

23 [Kurunthachalam.kannan@health.ny.gov](mailto:Kurunthachalam.kannan@health.ny.gov)

24

25 <sup>3</sup>Office of the Director

26 Division of Intramural Population Health Research

27 *Eunice Kennedy Shriver* National Institute for Child Health and Human Development

28 The National Institutes of Health

29 6710b Rockledge Drive

30 Bethesda, MD 20892

31 1-301-496-6155

32 louisg@mail.nih.gov

33

34 Corresponding author:

35 Chirag J. Patel

36

37 Department of Biomedical Informatics

38 Harvard Medical School

39 Harvard University

40 10 Shattuck Street, Room 302

41 Boston, MA 02115

42 1-617-432-1195

43 chirag\_patel@hms.harvard.edu

44

45

46 Acknowledgement

47 The authors declare they have no actual or potential competing financial interests. This study is  
48 supported by the NIH grants (ES025052 and ES023504), and the Intramural Research Program  
49 of the *Eunice Kennedy Shriver* National Institute of Child Health and Human Development  
50 (contracts # N01-HD-3-3355; N01-HD-3-3356; N01-HD-3-3358; HHSN27500002;  
51 HHSN27500003; HHSN27500006)

52

53 Abstract

54 BACKGROUND: Along with time, variation in the exposome is dependent on the location and  
55 sex of study participants. One specific factor that may influence exposure co-variations is a  
56 shared household environment.

57

58 OBJECTIVES: To examine the influence of shared household and partner's sex in relation to the  
59 variation in 128 endocrine disrupting chemical (EDC) exposures among couples.

60

61 METHODS: In a cohort comprising 501 couples trying for pregnancy, we measured 128 (13  
62 chemical classes) persistent and non-persistent EDCs and estimated 1) sex-specific differences;  
63 2) variance explained by shared household; and 3) Spearman's rank correlation coefficients ( $r_s$ )  
64 for females, males, and couples' exposures.

65

66 RESULTS: Sex was correlated with 8 EDCs including polyfluoroalkyl substances (PFASs) ( $p <$   
67  $0.05$ ). Shared household explained 43% and 41% of the total variance for PFASs and blood  
68 metals, respectively, but less than 20% for the remaining 11 EDC classes. Co-exposure patterns  
69 of the exposome were similar between females and males, with within-class  $r_s$  higher for  
70 persistent and lower for non-persistent chemicals. Median  $r_s$ s of polybrominated compounds  
71 and urine metalloids were 0.45 and 0.09, respectively, for females (0.41 and 0.08 for males),  
72 whereas lower  $r_s$ s for these 2 classes were found for couples (0.21 and 0.04).

73

74 CONCLUSIONS: Overall, sex did not significantly affect EDC levels in couples. Individual, rather  
75 than shared environment, could be a major factor influencing the co-variation of 128 markers  
76 of the exposome. Correlations between exposures are lower in couples than in individual  
77 partners and have important analytical and sampling implications for epidemiological study.

78

79

80

81

82 Keywords: exposome, co-exposures, EDCs, combined exposure, POPs, metals, phthalates,  
83 persistent pollutants, mixtures, biomarkers, exposure assessment

84

85

86

87 Introduction

88 Variation of environmental exposure levels in the population is a complex phenomenon and is  
89 influenced by factors shared by individuals – such as those within a household – and non-  
90 shared factors specific to individuals, such as their sex. One could apply the exposome  
91 paradigm (Wild 2005), a model to capture the totality of exposures from conception onwards,  
92 to comprehensively characterize the individual-level and shared differences of exposure.  
93 However, the exposome is a dynamic entity with variations across time (temporal) and place  
94 (spatial) (Wild et al. 2013) underscoring the importance of considering variability when  
95 assessing human health.

96

97 Instead of trying to “capture all” lifetime exposures, investigators can focus on critical and  
98 sensitive time windows in human development such as pregnancy, infancy, childhood and  
99 adolescence to reduce temporal complexity (Stingone et al. 2017). Furthermore, household-  
100 level ascertainties of exposure (i.e., sampling individuals from households) has been posited  
101 to be sufficient surrogates for all individuals in the household (Potera 2014). These assumptions  
102 may help characterize the exposome and study its time-dependent relationship with health  
103 outcomes. For example, the Human Early-Life Exposome (HELIX) project seeks to define the  
104 pregnancy and early-life exposomes and health (Vrijheid et al. 2014), while the EXPOsOMICS  
105 project has its conceptual framework of a life-course approach to a broader range of exposures  
106 (Vineis et al. 2017).

107

108 Another challenge includes the difficulty of interpreting exposure-disease associations due to  
109 the dense correlations among all exposures (Ioannidis 2016). The dense correlation pattern  
110 makes it hard to identify the directionality of the potential causality (Ioannidis et al. 2009).  
111 Second, correlations between exposures vary (e.g. absolute median correlation from almost 0  
112 to above 0.5) and, thus, there is no universal scale to assess the biological significance (Patel  
113 and Ioannidis 2014). In addition, exposome-wide, or equivalently, environment-wide  
114 association studies (EWASs), assess all the associations between exposures and an outcome to  
115 identify potential etiologic signals (Manrai et al. 2017). The data-driven approach assumes little

116 to no collinearity between environmental predictors, but it is almost impossible to select any  
117 single uncorrelated exposures out from the dense exposome. One strategy for addressing these  
118 analytical issues is to characterize the correlations in diverse cohorts to provide reference levels  
119 to gauge biological significance of associations.

120

121 We investigated whether cohabiting couples trying for pregnancy would have similar  
122 concentrations of endocrine disrupting chemicals (EDCs) given their shared households, and  
123 whether concentrations varied across partners in light of their individual exposures arising from  
124 other environments such as lifestyle, recreation or occupation. This avenue of study is  
125 important given that EDCs have been found to affect human fecundity and fertility (Hauser  
126 2006; te Velde et al. 2010), though much of the available evidence relies on research conducted  
127 in either men or women but not couples. We utilized the Longitudinal Investigation of Fertility  
128 and the Environment (LIFE) Study to empirically assess couples' shared and individual variations  
129 in a mixture of EDCs. We selected the LIFE Study because it has 13 classes of EDCs quantified in  
130 both partners of the couple in keeping with the couple based nature of human reproduction  
131 (Buck Louis et al. 2014, 2016; Patel et al. 2016). To meet our overarching aim, we characterize  
132 the dense correlation structure of couples' EDC concentrations and then estimate shared and  
133 individual variability. Lastly, we discuss the implications of the findings in designing future  
134 exposome-related research.

135

## 136 Methods

### 137 *Study Design and Cohort*

138 Briefly, the LIFE Study enrolled 501 couples planning to discontinue contraception to become  
139 pregnant from 16 counties in Michigan and Texas, 2005–2009. Couples were followed daily  
140 until pregnant or up to 12 months of trying to become pregnant (infertile). Study participants  
141 were screened for eligibility based on a set of criteria and the complete details have been  
142 previously published (Buck Louis et al. 2011).

143

### 144 *Data Collection and Toxicologic Analysis*

145 Following enrollment and completion of the baseline interview, couples provided  
146 preconception blood (20 mL) and urine (120 mL) samples for the quantification of both man-  
147 made and natural EDCs (e.g. phytoestrogens). We also included serum cotinine, a metabolite of  
148 nicotine, and have a total of 128 chemicals from 13 different classes (Table 1). Persistent EDCs  
149 included 4 classes of serum persistent organic compounds: 36 congeners of polychlorinated  
150 biphenyls (PCBs), 9 organochlorine pesticides (OCPs), 11 polybrominated chemicals  
151 [polybrominated diphenyl ethers (PBDEs) and 1 polybrominated biphenyl (PBB)], and 7  
152 polyfluoroalkyl substances (PFASs), and were quantified by a single laboratory using published  
153 standard operating procedures (Kuklenyik et al. 2005; Sjödin et al. 2004).

154  
155 Non-persistent EDCs included 5 classes of urinary non-persistent organic compounds: 6  
156 phytoestrogens, 14 phthalate metabolites, 6 phenols [bisphenol A (BPA) and benzophenones  
157 (BPs)], 12 antimicrobial chemicals [parabens, triclosan (TCS) and triclocarban (TCC)], 2  
158 paracetamol & derivatives, and were quantified by another laboratory using published standard  
159 operating procedures (Asimakopoulos et al. 2014; Guo et al. 2011; Mumford et al. 2015; Smarr  
160 et al. 2016). Other 3 classes of EDCs included 3 blood metals, 17 urinary metals, and 4 urinary  
161 metalloids (Bloom et al. 2015a).

162  
163 Serum lipids were obtained by measuring total cholesterol, free cholesterol, triglycerides, and  
164 phospholipids by an enzymatic method (Akins et al. 1989) and we calculated the total serum  
165 lipids as described by Phillips et al. (1989). Creatinine was measured by a Roche/Hitachi Model  
166 912 clinical analyzer (Dalla, TX, USA) using the Creatinine Plus Assay (Roche Diagnostics). Serum  
167 cotinine was quantified by isotope dilution tandem mass spectrometry (Bernert et al. 1997).

### 168 169 *Statistical Analysis*

170 Our overall analytical scheme is shown in Figure 1. First, we adjusted each of the indicators of  
171 exposures for potential confounders in addition to total lipids (for lipophilic chemicals,  $n = 56$ )  
172 and creatinine (for urinary chemicals,  $n = 61$ ) to reduce estimate variability and susceptibility to  
173 bias (Heavner et al. 2006; Schisterman et al. 2005). Specifically, we adjusted PCBs, OCPs, and

174 polybrominated chemicals for total lipids and all other urinary chemicals for creatinine.  
175 Chemicals were log-transformed ( $x + 1$ ) and continuous covariates were rescaled to have mean  
176 zero and unit variance (Figure 1A). After extracting the residuals, we calculated the Spearman's  
177 rank correlation ( $r_s$ ) matrices for EDCs in females, males, and couples.

178  
179 Adjusting procedures such as Bonferroni correction assume independence between  
180 independent variables. One way to resolve this analytical issue is to account for the correlation.  
181 To study the effect of correlations between exposures on the family-wise error rate, we  
182 calculated the effective number of variables ( $M_{eff}$ ) (Nyholt 2004) for estimating the Bonferroni  
183 adjusted  $p$  values with formula 1, where  $Var(\lambda_{obs})$  is the eigenvalue variance of the correlation  
184 matrix and  $M$  is the original number of variables.

185

$$186 \quad M_{eff} = 1 + (M - 1) \left( 1 - \frac{Var(\lambda_{obs})}{M} \right) \dots \text{formula 1}$$

187

188 We estimated the sex-specific difference with a paired t-test (by household) after extracting the  
189 residuals from a linear model adjusted for age (Figure 1B). We used a similar approach to  
190 estimate the percentage of variance explained by the shared environment. However, sex and  
191 age variables were excluded in the adjustment step to isolate their effects (Figure 1C).  
192 Afterward, we extracted and regressed the residuals against the household variable to obtain  
193 the adjusted coefficient of determination ( $R^2$ ).

194

195 We computed concordance as the Pearson correlation coefficient ( $r$ ) between the chemical  
196 relatedness  $r_s$  in this study and that in the 2003–2004 National Health and Nutrition  
197 Examination Survey (NHANES) (Patel and Ioannidis 2014) to assess generalizability of the co-  
198 exposure patterns. We estimated the concordance based on a total of 101 matched biomarkers  
199 between the 2 studies. We chose the 2003–2004 NHANES because 1) many of the chemicals  
200 measured in LIFE were also measured in NHANES and 2) by the same laboratory; and 3) the  
201 time period (2003–2004) is close to the beginning of recruitment for the LIFE Study.

202



203 We used all the instrument derived concentrations for the analyses (Richardson and Ciampi  
204 2003; Schisterman et al. 2006). For missing values, we substituted them by multiple imputation,  
205 assuming a missing-at-random scenario (Louis et al. 2013). We conducted imputation based on  
206 the information from available demographic, previous history of clinical symptoms and all other  
207 chemical variables and created a total of 10 imputed data sets for males and females  
208 separately.

209

210 We visualized the correlations between exposures as exposome globe using the R package  
211 Circlize (v 0.3.1) (Gu et al. 2014). EDCs were sorted from lipophilic to hydrophilic to aid visual  
212 interpretation of the patterns. We combined the final estimates from imputations using Rubin's  
213 method (Schafer 1999) and calculate the  $p$  values of correlations by permutation tests. To  
214 adjust for multiple testing, we used the false discovery rate (FDR)  $q$  values unless otherwise  
215 specified. We executed all analyses using the computing environment R (v 3.3.1) (R Core Team  
216 2016). For reproducibility purpose, all analytic code is publicly available on GitHub via a MIT  
217 license ([github.com/jakemkc/exposome\\_variability](https://github.com/jakemkc/exposome_variability)).

218

219

220

221 Results

222 Important sociodemographic differences were observed between partners (Table 2). Overall,  
223 female partners were younger, had a lower body mass index (BMI) (< 25), consumed fewer  
224 alcoholic drinks, were less likely to report a hypertension or high cholesterol, and had lower  
225 serum cotinine and lipids and creatinine than male partners ( $p < 0.01$ ).

226

227 Nine (7%) chemicals were correlated with partner's sex ( $p < 0.05$ ), i.e., cotinine, blood lead,  
228 mercury and cadmium; and 5 PFASs: perfluorodecanoate (PFDeA), perfluorononanoate (PFNA),  
229 perfluorooctane sulfonamide (PFOSA), perfluorooctane sulfonate (PFOS), and  
230 perfluorooctanoate (PFOA). Of note, findings were robust to the FDR with the exception of  
231 blood cadmium.

232

233 Figure 2 shows the boxplot summary of the variance explained by the shared environment. We  
234 estimated that two classes of chemicals, PFASs and blood metals, had higher levels of explained  
235 variance (median 0.43 and 0.41 respectively) than the others. For the rest of the 11 classes,  
236 median explained variances were ranged from 0.04 (phthalates) to 0.21 (cotinine). A few  
237 persistent organic compounds, namely PCB congener 28, PBDE congener 47, and  $\beta$ -  
238 hexachlorocyclohexane ( $\beta$ -HCH), had an explained variance over 50%.

239

240 The exposome globe (Patel and Manrai 2015) displays the  $r_{s}$ s for females (right-half), for males  
241 (left-half), and for couples (across the left-right of the globe) (Figure 3). To assist interpretation,  
242 we only presented the  $r_{s}$ s outside the range of  $-0.25$  to  $0.25$  as lines connecting different parts  
243 on the track, and they represent less than 10% of all the  $r_{s}$ s. For females, we observed two  
244 larger positively correlated "clusters" across EDC classes: A) a dense cluster with serum  
245 persistent organic compounds such as PCBs and OCPs (upper right of Figure 3); B) another  
246 loosely packed cluster with urinary EDCs such as phytoestrogens, phthalates, phenols, and  
247 antimicrobial compounds (lower right of Figure 3). Correlations between serum and urinary  
248 EDCs were mostly small and distributed between  $-0.25$  and  $0.25$ . For males, there were similar  
249 co-exposure patterns to females

250

251 While we found similar correlations in the population of males and females separately, we  
252 found that correlations in couple living in the same household were, in fact, less densely packed  
253 and with values attenuated toward the null (Figure 3; see Figure S1).

254

255 Summary of the within-class correlations as absolute magnitude is shown in Figure 4. For  
256 females (Figure 4A), we found that polybrominated compounds had the highest median  
257 correlation ( $r_s = 0.45$ ) while urine metalloids had the lowest ( $r_s = 0.09$ ). Across different  
258 chemical classes, persistent organic compounds such as polybrominated compounds, PCBs and  
259 OCPs had higher median correlations (0.45, 0.38, and 0.34 respectively). For the rest of the  
260 classes, the median correlations were all below 0.25. Males (Figure 4B) had similar within-class  
261 correlation distributions as were found in females. The class with highest and lowest median  
262 correlations were polybrominated compounds ( $r_s = 0.41$ ) and paracetamols ( $r_s = 0.02$ )  
263 respectively.

264

265 In contrast, we found a strong diminishing effects to the within-class correlations, both in terms  
266 of the median and interquartile range (IQR), in couples (Figure 4C). Comparing the couples with  
267 females and males, all chemical classes had the median correlations below 0.25 and urine  
268 metals were the class with greatest percentage drop (83%). We also observed a substantial  
269 reduction in the IQRs of the chemical classes. For example, the IQR of polybrominated  
270 compounds was 0.21, which corresponds to an over 35% drop relatively to females and males.  
271 We found that urine metals had the largest drop in IQR (over 77%). Looking more closely to the  
272 data, correlations between the same chemicals in couples (i.e. the diagonal of the correlation  
273 matrix of couples) were generally higher than that among the same class members. Because of  
274 the low number of exposure indicators in blood metals (3 chemicals), paracetamols (2  
275 chemicals), and cotinine (1 chemical), the diminishing effect to within-class correlations was  
276 countered and thus the drop in medians and IQRs of these classes were not as prominent as  
277 others.

278

279 *P* values obtained from Bonferroni correction with  $M_{\text{eff}}$  were highly similar between females  
280 and males (Table 3). Both groups had similar  $M_{\text{eff}}$  values with a difference smaller than 1  
281 variable, suggesting that the overall degree of correlations was also similar. After adjusting for  
282 the correlation, we found the total number of variables decreased from 128 to 112 for females  
283 and 113 for males.

284

285 We estimated the concordances between correlations in the LIFE study (as females, males and  
286 couples) and the 2003-2004 NHANES in Table 4. Overall, correlations  $r$  varied greatly between  
287 chemical groups, from  $-0.78$  to  $0.98$ . Certain chemical groups had small sample size ( $n \leq 6$ ) and  
288 could cause low and inverse correlations. However, correlations  $r$  were more consistent and  
289 comparable when we discarded group information and considered all chemicals as a whole  
290 (females:  $0.88$ ; males:  $0.84$ ; couples:  $0.67$ ); therefore, we conclude the exposure correlation  
291 patterns captured in LIFE are comparable to that in the U.S. population.

292

293 Discussion

294 *Findings*

295 Understanding the co-exposure patterns is an important step toward investigating the joint  
296 health effects of chemical mixtures and for statistical design of exposome-related  
297 investigations. We describe our high level findings here. First, exposure levels of one individual  
298 in the household were not correlated with another individual in the same household. Second,  
299 the percentages of significant  $r_s$  ( $q < 0.05$ ) in males and females were 25.3 and 23.1  
300 respectively, in contrast to only 9.5% between couples in the same household (Figure 4).  
301 Chemical correlations in a household setting were concordant to those in 03–04 NHANES,  
302 indicating reproducible co-exposure correlations with respect to the patterns sought in a  
303 generalized and non-institutionalized U.S. population.

304

305 Although couples in our study potentially shared a large degree of dietary and indoor  
306 environmental factors, their exposures were only modestly correlated (low  $r_s$ ). We believe that  
307 there are two additional factors affecting the familial co-exposure patterns in our investigation.

308 The first one is concerned with how long the couples have been living together. In the U.S., the  
309 median age of first marriage is over 24 since 2000 (U.S. Census Bureau 2016), and newly  
310 married couples could show a greater discordance in chemical co-exposure relationships due to  
311 a different pre-marriage exposures. The second factor is potential physiological dampening of  
312 exposure variability related to the half-life of the target chemicals (Makey et al. 2014;  
313 Rappaport and Kupper 2008). Polybrominated compounds, PCBs, and OCPs are persistent  
314 chemicals with high lipophilicity and longer half-lives (on the order of years). Their serum  
315 concentrations are integrated over a period of time and not completely associated with recent  
316 exposure (Aylward et al. 2014). Since most of the couples recruited in LIFE Study were living  
317 together, we claim this phenomenon can explain the drop in  $r_s$  of persistent chemicals relative  
318 to the short-lived urinary chemicals (such as phthalate metabolites, whose half-lives are on the  
319 order of days) in couples (Figure 4).

320  
321 Wu et al. (2015) conducted a household-based study and measured serum PBDE levels in  
322 children and parents and reported the  $r_s$  between child and parent were in the range of 0.66 to  
323 0.74 (median = 0.68,  $n = 68$ ) for a number of PBDE compounds. The pairs shared a substantial  
324 portion of genes, diet, and living environment and they found that for the latter 2 components,  
325 measured as floor-wipe PBDEs, canned meat, tuna and whitefish, were predictive of serum  
326 PBDEs. Furthermore, they found higher  $r_s$  of PBDEs between older couples (age  $\geq 55$ , range =  
327 0.45 to 0.78, median = 0.72). These findings are consistent with our claim.

328  
329 Persistent organic chemicals are known to cause adverse health effects and are prioritized by  
330 the U.S. Centers for Disease Control and Prevention for health monitoring (Li et al. 2006). Many  
331 of them had wide applications in electrical/electronic equipment, agricultural chemicals, and  
332 furniture (Dodson et al. 2012; Whitehead et al. 2011). Although other emerging EDCs such as  
333 BPA and phthalates have short half-lives, they have extensive modern applications in cosmetics  
334 and consumer products (Bloom et al. 2015b; Buck Louis et al. 2014; Louis et al. 2014; Smarr et  
335 al. 2017). The ubiquity of these chemicals in different microenvironments such as schools and  
336 offices suggests that household environment alone is not a major contributor to body burden,

337 consistent with our results (Figure 2). PFASs and blood metals had higher variance explained by  
338 the shared environment than other chemical classes and we believe that this could be related  
339 to the lifestyle of the subjects in the LIFE cohort (e.g. PFAS exposures via food items and  
340 personal care products).

341

#### 342 *Strength and Limitations*

343 Our investigation includes 128 chemical biomarkers with diverse physicochemical properties  
344 that span from persistent lipophilic to non-persistent hydrophilic chemicals and is one of the  
345 first attempts to systematically characterize their correlations in a household setting. However,  
346 we do not know how long the couples have been living together at the baseline of the study to  
347 quantitatively assess how this factor affects co-exposure patterns. Also, we only collected  
348 biological samples at the baseline; thus, it is not possible to study how exposure levels and co-  
349 exposure patterns change longitudinally with time, which could be an important piece of  
350 information for assessing fecundity outcome and chemical exposures.

351

#### 352 *Analytical and Sampling Implications for Exposome-Wide Investigations*

353 Our findings have implications for high-throughput association tests between correlated  
354 exposures and health outcomes and phenotypes. One of the typical approaches adjusting for  
355 multiplicity in EWASs is controlling the family-wise error rate (e.g. Bonferroni correction).  
356 However, the tests are assumed to be independent. Nyholt (2004) provided one solution to  
357 address correlation in Bonferroni correction by calculating the effective number of variables  
358 ( $M_{\text{eff}}$ , formula 1), which relies on identifying the number of variables,  $M$ , and estimating the  
359 eigenvalue variance,  $\text{Var}(\lambda_{\text{obs}})$  of the correlation matrix. For example, conducting an EWAS of a  
360 response with respect to the chemical class PCBs containing 36 congeners, one can calculate  
361 the correlation matrix ( $M = 36$ ) and estimate the associated  $\text{Var}(\lambda_{\text{obs}})$  to obtain  $M_{\text{eff}}$  (Table 3). A  
362 new significance level for this set of comparisons will be  $\alpha/M_{\text{eff}}$ , which is less stringent than  
363 Bonferroni correction because  $M_{\text{eff}}$  will be smaller than  $M$  if correlations exist between  
364 congeners. Benjamini and Yekutieli (2001) and Fan et al. (2012) documented a procedure that  
365 considers the correlation structure for better controlling the FDR.

366

367 In the future, exposome-related investigations, will include many more variables than ever  
368 before with the emergence of highly sensitive high-resolution mass spectrometry techniques  
369 (Jones 2016) and availability of large data sets from reproducibility initiatives (Manrai et al.  
370 2017). Attempts to assess health outcome associated with a number of exposures may increase  
371  $R^2$  and lead to “overfitting” (Hawkins 2004). Additionally, dense correlations among exposures  
372 indicate that multicollinearity may also influence the reliability of the association size in  
373 multiple regression or even potential confounding. We claim that these analytic challenges  
374 could be ameliorated through understanding co-exposure patterns. For example, statistical  
375 approaches for evaluating the effects of mixture exposures such as principal component  
376 analysis generally involve dimensionality reduction that relies on estimating the correlation  
377 structure to reduce the number of exposures being considered prior to analysis but are difficult  
378 to interpret (Taylor et al. 2016). Other regression approaches, such as the Elastic Net (Zou and  
379 Hastie 2005) can consider highly co-linear exposure variables while giving coefficients that are  
380 similar to that delivered from a typical regression model; however, inferential estimates (e.g.  $p$   
381 values and confidence intervals) are still in development (Taylor and Tibshirani 2015).

382

383

384 Capturing population-level exposure variability — and the demographic variables that are  
385 associated with the variation, such as sex, location, and time — is a grand ambition in the  
386 exposome concept (Manrai et al. 2017). Given people spend over 90% of their time indoor and  
387 more than 12 hours a day at home (bls.gov/tus), household samples (e.g. such as house dust)  
388 might be a reasonable surrogate to represent home exposures to family members who share  
389 the same living environment. While sampling the household is a tempting approach because of  
390 the simplicity and cost-savings over personal measurement, it may fail to catch a significant  
391 fraction of exposure variability in the population as we found that shared environment could  
392 explain a small percentage of biomarker variance (Figure 2). For epidemiological investigation  
393 that sample study participants who are nested in a unit, for example, schools or homes,

394 conducting preliminary measurements to assess the influence of shared environment is one of  
395 the ways to justify unit-based measurement.

396

397 Finally, correlations of chemical mixtures can also be an important tool used in exposure  
398 science and cumulative risk assessment as groups of correlated chemicals are often released  
399 from a single source (e.g. power plant and vehicular exhaust (Ravindra et al. 2008). Thus,  
400 studying the co-exposure patterns is the first step to identify the sources prior to more in-depth  
401 source apportionment methods such as positive matrix factorization and chemical mass  
402 balance receptor models (Rizzo and Scheff 2007). In cumulative risk assessment, dose addition  
403 is one of the common approaches to estimate the risks from mixture exposures by assuming a  
404 shared toxicity mechanism between chemicals (e.g. binding to the same receptor) (Chen et al.  
405 2001). Knowing the co-exposure correlations could be a first step toward identification of  
406 exposures with similar physicochemical properties to guide follow-up investigations.

407 **Conclusions**

408 While we observed similar co-exposure patterns between females and males, the correlations  
409 were much lower in couples. Our analyses empirically demonstrate that shared environment  
410 explains less than 20% of the biomarker variance in 11 out of 13 EDC classes. The influence of  
411 shared environment to EDC levels is likely conditional on 1) the duration of residence of the  
412 subjects and 2) the lipophilicity and persistency of the chemicals. These factors should be  
413 considered when using surrogate measurement to assess the exposures of family members.

414

415

416

417

418

419

420

421



422 References

- 423 Akins JR, Waldrep K, Bernert JT. 1989. The estimation of total serum lipids by a completely  
424 enzymatic “summation” method. *Clin. Chim. Acta* 184: 219–226.
- 425 Asimakopoulos AG, Wang L, Thomaidis NS, Kannan K. 2014. A multi-class bioanalytical  
426 methodology for the determination of bisphenol A diglycidyl ethers, p-hydroxybenzoic acid  
427 esters, benzophenone-type ultraviolet filters, triclosan, and triclocarban in human urine by  
428 liquid chromatography-tandem mass spectrometry. *J. Chromatogr. A* 1324: 141–148.
- 429 Aylward LL, Hays SM, Smolders R, Koch HM, Cocker J, Jones K, et al. 2014. Sources of variability  
430 in biomarker concentrations. *J. Toxicol. Environ. Health B Crit. Rev.* 17: 45–61.
- 431 Benjamini Y, Yekutieli D. 2001. The Control of the False Discovery Rate in Multiple Testing under  
432 Dependency. *Ann. Stat.* 29: 1165–1188.
- 433 Bernert JT Jr, Turner WE, Pirkle JL, Sosnoff CS, Akins JR, Waldrep MK, et al. 1997. Development  
434 and validation of sensitive method for determination of serum cotinine in smokers and  
435 nonsmokers by liquid chromatography/atmospheric pressure ionization tandem mass  
436 spectrometry. *Clin. Chem.* 43: 2281–2291.
- 437 Bloom MS, Buck Louis GM, Sundaram R, Maisog JM, Steuerwald AJ, Parsons PJ. 2015a. Birth  
438 outcomes and background exposures to select elements, the Longitudinal Investigation of  
439 Fertility and the Environment (LIFE). *Environ. Res.* 138: 118–129.
- 440 Bloom MS, Whitcomb BW, Chen Z, Ye A, Kannan K, Buck Louis GM. 2015b. Associations  
441 between urinary phthalate concentrations and semen quality parameters in a general  
442 population. *Hum. Reprod.* 30: 2645–2657.
- 443 Buck Louis GM, Barr DB, Kannan K, Chen Z, Kim S, Sundaram R. 2016. Paternal exposures to  
444 environmental chemicals and time-to-pregnancy: overview of results from the LIFE study.  
445 *Andrology* 4: 639–647.

- 446 Buck Louis GM, Schisterman EF, Sweeney AM, Wilcosky TC, Gore-Langton RE, Lynch CD, et al.  
447 2011. Designing prospective cohort studies for assessing reproductive and developmental  
448 toxicity during sensitive windows of human reproduction and development – the LIFE  
449 Study. *Paediatr. Perinat. Epidemiol.* 25: 413–424.
- 450 Buck Louis GM, Sundaram R, Sweeney AM, Schisterman EF, Maisog J, Kannan K. 2014. Urinary  
451 bisphenol A, phthalates, and couple fecundity: the Longitudinal Investigation of Fertility  
452 and the Environment (LIFE) Study. *Fertil. Steril.* 101: 1359–1366.
- 453 Chen JJ, Chen YJ, Rice G, Teuschler LK, Hamernik K, Protzel A, et al. 2001. Using dose addition to  
454 estimate cumulative risks from exposures to multiple chemicals. *Regul. Toxicol. Pharmacol.*  
455 34: 35–41.
- 456 Dodson RE, Perovich LJ, Covaci A, Van den Eede N, Ionas AC, Dirtu AC, et al. 2012. After the  
457 PBDE phase-out: a broad suite of flame retardants in repeat house dust samples from  
458 California. *Environ. Sci. Technol.* 46: 13056–13066.
- 459 Fan J, Han X, Gu W. 2012. Estimating False Discovery Proportion Under Arbitrary Covariance  
460 Dependence. *J. Am. Stat. Assoc.* 107: 1019–1035.
- 461 Guo Y, Alomirah H, Cho H-S, Minh TB, Mohd MA, Nakata H, et al. 2011. Occurrence of phthalate  
462 metabolites in human urine from several Asian countries. *Environ. Sci. Technol.* 45: 3138–  
463 3144.
- 464 Gu Z, Gu L, Eils R, Schlesner M, Brors B. 2014. circlize Implements and enhances circular  
465 visualization in R. *Bioinformatics* 30: 2811–2812.
- 466 Hauser R. 2006. The environment and male fertility: recent research on emerging chemicals and  
467 semen quality. *Semin. Reprod. Med.* 24: 156–167.
- 468 Hawkins DM. 2004. The problem of overfitting. *J. Chem. Inf. Comput. Sci.* 44: 1–12.
- 469 Heavner DL, Morgan WT, Sears SB, Richardson JD, Byrd GD, Ogden MW. 2006. Effect of

- 470 creatinine and specific gravity normalization techniques on xenobiotic biomarkers in  
471 smokers' spot and 24-h urines. *J. Pharm. Biomed. Anal.* 40: 928–942.
- 472 Ioannidis JPA. 2016. Exposure-wide epidemiology: revisiting Bradford Hill. *Stat. Med.* 35: 1749–  
473 1762.
- 474 Ioannidis JPA, Loy EY, Poulton R, Chia KS. 2009. Researching genetic versus nongenetic  
475 determinants of disease: a comparison and proposed unification. *Sci. Transl. Med.* 1: 7ps8.
- 476 Jones DP. 2016. Sequencing the exposome: A call to action. *Toxicol Rep* 3: 29–45.
- 477 Kuklennyik Z, Needham LL, Calafat AM. 2005. Measurement of 18 perfluorinated organic acids  
478 and amides in human serum using on-line solid-phase extraction. *Anal. Chem.* 77: 6085–  
479 6091.
- 480 Li QQ, Loganath A, Chong YS, Tan J, Obbard JP. 2006. Persistent organic pollutants and adverse  
481 health effects in humans. *J. Toxicol. Environ. Health A* 69: 1987–2005.
- 482 Louis GMB, Kannan K, Sapra KJ, Maisog J, Sundaram R. 2014. Urinary concentrations of  
483 benzophenone-type ultraviolet radiation filters and couples' fecundity. *Am. J. Epidemiol.*  
484 180: 1168–1175.
- 485 Louis GMB, Sundaram R, Schisterman EF, Sweeney AM, Lynch CD, Gore-Langton RE, et al. 2013.  
486 Persistent environmental pollutants and couple fecundity: the LIFE study. *Environ. Health*  
487 *Perspect.* 121: 231–236.
- 488 Makey CM, McClean MD, Sjödin A, Weinberg J, Carignan CC, Webster TF. 2014. Temporal  
489 variability of polybrominated diphenyl ether (PBDE) serum concentrations over one year.  
490 *Environ. Sci. Technol.* 48: 14642–14649.
- 491 Manrai AK, Cui Y, Bushel PR, Hall M, Karakitsios S, Mattingly CJ, et al. 2017. Informatics and  
492 Data Analytics to Support Exposome-Based Discovery for Public Health. *Annu. Rev. Public*  
493 *Health* 38: 279–294.

- 494 Mumford SL, Kim S, Chen Z, Boyd Barr D, Buck Louis GM. 2015. Urinary Phytoestrogens Are  
495 Associated with Subtle Indicators of Semen Quality among Male Partners of Couples  
496 Desiring Pregnancy. *J. Nutr.* 145: 2535–2541.
- 497 Nyholt DR. 2004. A simple correction for multiple testing for single-nucleotide polymorphisms  
498 in linkage disequilibrium with each other. *Am. J. Hum. Genet.* 74: 765–769.
- 499 Patel CJ, Ioannidis JPA. 2014. Placing epidemiological results in the context of multiplicity and  
500 typical correlations of exposures. *J. Epidemiol. Community Health* 68: 1096–1100.
- 501 Patel CJ, Manrai AK. 2015. Development of exposome correlation globes to map out  
502 environment-wide associations. *Pac. Symp. Biocomput.* 231–242.
- 503 Patel CJ, Sundaram R, Buck Louis GM. 2016. A data-driven search for semen-related phenotypes  
504 in conception delay. *Andrology* 5: 95–102.
- 505 Phillips DL, Pirkle JL, Burse VW, Bernert JT Jr, Henderson LO, Needham LL. 1989. Chlorinated  
506 hydrocarbon levels in human serum: effects of fasting and feeding. *Arch. Environ. Contam.*  
507 *Toxicol.* 18: 495–500.
- 508 Potera C. 2014. The HELIX Project: tracking the exposome in real time. *Environ. Health Perspect.*  
509 122: A169.
- 510 Rappaport SM, Kupper LL. 2008. *Quantitative exposure assessment*. El Cerrito, CA:S. Rappaport.
- 511 Ravindra K, Sokhi R, Van Grieken R. 2008. Atmospheric polycyclic aromatic hydrocarbons:  
512 Source attribution, emission factors and regulation. *Atmos. Environ.* 42: 2895–2921.
- 513 R Core Team. 2016. *R: A Language and Environment for Statistical Computing*.
- 514 Richardson DB, Ciampi A. 2003. Effects of exposure measurement error when an exposure  
515 variable is constrained by a lower limit. *Am. J. Epidemiol.* 157: 355–363.
- 516 Rizzo MJ, Scheff PA. 2007. Utilizing the Chemical Mass Balance and Positive Matrix Factorization

- 517 models to determine influential species and examine possible rotations in receptor  
518 modeling results. *Atmos. Environ.* 41: 6986–6998.
- 519 Schafer JL. 1999. Multiple imputation: a primer. *Stat. Methods Med. Res.* 8: 3–15.
- 520 Schisterman EF, Vexler A, Whitcomb BW, Liu A. 2006. The limitations due to exposure detection  
521 limits for regression models. *Am. J. Epidemiol.* 163: 374–383.
- 522 Schisterman EF, Whitcomb BW, Louis GMB, Louis TA. 2005. Lipid adjustment in the analysis of  
523 environmental contaminants and human health risks. *Environ. Health Perspect.* 113: 853–  
524 857.
- 525 Sjödin A, Jones RS, Lapeza CR, Focant J-F, McGahee EE 3rd, Patterson DG Jr. 2004.  
526 Semiautomated high-throughput extraction and cleanup method for the measurement of  
527 polybrominated diphenyl ethers, polybrominated biphenyls, and polychlorinated biphenyls  
528 in human serum. *Anal. Chem.* 76: 1921–1927.
- 529 Smarr MM, Grantz KL, Sundaram R, Maisog JM, Honda M, Kannan K, et al. 2016. Urinary  
530 paracetamol and time-to-pregnancy. *Hum. Reprod.* 31: 2119–2127.
- 531 Smarr MM, Sundaram R, Honda M, Kannan K, Louis GMB. 2017. Urinary Concentrations of  
532 Parabens and Other Antimicrobial Chemicals and Their Association with Couples'  
533 Fecundity. *Environ. Health Perspect.* 125: 730–736.
- 534 Stingone JA, Buck Louis GM, Nakayama SF, Vermeulen RCH, Kwok RK, Cui Y, et al. 2017. Toward  
535 Greater Implementation of the Exposome Research Paradigm within Environmental  
536 Epidemiology. *Annu. Rev. Public Health* 38: 315–327.
- 537 Taylor J, Tibshirani RJ. 2015. Statistical learning and selective inference. *Proc. Natl. Acad. Sci. U.*  
538 *S. A.* 112: 7629–7634.
- 539 Taylor KW, Joubert BR, Braun JM, Dilworth C, Gennings C, Hauser R, et al. 2016. Statistical  
540 Approaches for Assessing Health Effects of Environmental Chemical Mixtures in

- 541           Epidemiology: Lessons from an Innovative Workshop. *Environ. Health Perspect.* 124:  
542           A227–A229.
- 543   te Velde E, Burdorf A, Nieschlag E, Eijkemans R, Kremer JAM, Roeleveld N, et al. 2010. Is human  
544           fecundity declining in Western countries? *Hum. Reprod.* 25: 1348–1353.
- 545   U.S. Census Bureau. 2016. Current Population Survey: Annual Social and Economic Supplement.
- 546   Vineis P, Chadeau-Hyam M, Gmuender H, Gulliver J, Herceg Z, Kleinjans J, et al. 2017. The  
547           exposome in practice: Design of the EXPOsOMICS project. *Int. J. Hyg. Environ. Health* 220:  
548           142–151.
- 549   Vrijheid M, Slama R, Robinson O, Chatzi L, Coen M, van den Hazel P, et al. 2014. The human  
550           early-life exposome (HELIX): project rationale and design. *Environ. Health Perspect.* 122:  
551           535–544.
- 552   Whitehead T, Metayer C, Buffler P, Rappaport SM. 2011. Estimating exposures to indoor  
553           contaminants using residential dust. *J. Expo. Sci. Environ. Epidemiol.* 21: 549–564.
- 554   Wild CP. 2005. Complementing the Genome with an “Exposome”: The Outstanding Challenge of  
555           Environmental Exposure Measurement in Molecular Epidemiology. *Cancer Epidemiol.*  
556           *Biomarkers Prev.* 14: 1847–1850.
- 557   Wild CP, Scalbert A, Herceg Z. 2013. Measuring the exposome: a powerful basis for evaluating  
558           environmental exposures and cancer risk. *Environ. Mol. Mutagen.* 54: 480–499.
- 559   Wu XM, Bennett DH, Moran RE, Sjödin A, Jones RS, Tancredi DJ, et al. 2015. Polybrominated  
560           diphenyl ether serum concentrations in a Californian population of children, their parents,  
561           and older adults: an exposure assessment study. *Environ. Health* 14: 23.
- 562   Zou H, Hastie T. 2005. Regularization and variable selection via the elastic net. *J. R. Stat. Soc.*  
563           *Series B Stat. Methodol.* 67: 301–320.

565 Table 1. List of chemical classes and measured chemicals in the current study.

| EDC Class                             | No. | Individual Chemicals                                                                                                                                                                                                                                                                                                                                                                                                                                                                                                                         | Medium | LOQ                        |
|---------------------------------------|-----|----------------------------------------------------------------------------------------------------------------------------------------------------------------------------------------------------------------------------------------------------------------------------------------------------------------------------------------------------------------------------------------------------------------------------------------------------------------------------------------------------------------------------------------------|--------|----------------------------|
| Polychlorinated biphenyls (PCBs)      | 36  | Congeners: 28, 44, 49, 52, 66, 74, 87, 99, 101, 105, 110, 114, 118, 128, 138, 146, 149, 151, 153, 156, 157, 167, 170, 172, 177, 178, 180, 183, 187, 189, 194, 195, 196, 201, 206, 209                                                                                                                                                                                                                                                                                                                                                        | Serum  | 1-3 pg/g, wet weight       |
| Organochlorine pesticides (OCPs)      | 9   | Hexachlorobenzene (HCB), $\beta$ -hexachlorocyclohexane ( $\beta$ -HCH), $\gamma$ -hexachlorocyclohexane ( $\gamma$ -HCH), oxychlorane, <i>trans</i> -nonachlor, <i>p,p'</i> -DDT, <i>o,p'</i> -DDT, <i>p,p'</i> -DDE, and mirex                                                                                                                                                                                                                                                                                                             | Serum  | 1-3 pg/g, wet weight       |
| Polybrominated chemicals <sup>a</sup> | 11  | Brominated biphenyl (BB 153); brominated diphenyl ethers (BDEs) congeners: 17, 28, 47, 66, 85, 99, 100, 153, 154, 183                                                                                                                                                                                                                                                                                                                                                                                                                        | Serum  | 5 pg/g, wet weight         |
| Polyfluoroalkyl substances (PFASs)    | 7   | 2-( <i>N</i> -ethyl-perfluorooctane sulfonamido) acetate (Et-PFOSA-AcOH), 2-( <i>N</i> -methyl-perfluorooctane sulfonamido) acetate (Me-PFOSA-AcOH), perfluorodecanoate (PFDeA), perfluorononanoate (PFNA), perfluorooctane sulfonamide (PFOSA), perfluorooctane sulfonate (PFOS), and perfluorooctanoate (PFOA)                                                                                                                                                                                                                             | Serum  | 0.04-0.1 ng/mL, wet weight |
| Phytoestrogens                        | 6   | Genistein, daidzein, <i>O</i> -desmethylangolensin, equol, enterodiol, and enterolactone                                                                                                                                                                                                                                                                                                                                                                                                                                                     | Urine  | 0.2-0.6 ng/mL              |
| Phthalate metabolites                 | 14  | Mono (3-carboxypropyl) phthalate (mCPP), monomethyl phthalate (mMP), monoethyl phthalate (mEP), mono (2-isobutyl phthalate) (miBP), mono- <i>n</i> -butyl phthalate (mBP), mono (2-ethyl-5-carboxyphenyl) phthalate (mECP), mono-[(2-carboxymethyl) hexyl] phthalate (mCMHP), mono (2-ethyl-5-oxohexyl) phthalate (mEOHP), mono (2-ethyl-5-hydroxyhexyl) phthalate (mEHHP), monocyclohexyl phthalate (mCHP), monobenzyl phthalate (mBzP), mono (2-ethylhexyl) phthalate (mEHP), mono-isononyl phthalate (mNP), and monooctyl phthalate (mOP) | Urine  | 0.2-2 ng/mL                |
| Phenols <sup>b</sup>                  | 6   | Total bisphenol A (BPA); benzophenones (BPs): 4-hydroxybenzophenone (4-OH-BP), 2,4-dihydroxybenzophenone (2,4-OH-BP), 2,2',4,4'-tetrahydroxybenzophenone (2,2',4,4'-OH-BP), 2-hydroxy-4-methoxybenzophenone (2-OH-4-MeO-BP), and 2,2'-dihydroxy-4-methoxybenzophenone (2,2'-OH-4-MeO-BP)                                                                                                                                                                                                                                                     | Urine  | 0.02-0.05 ng/mL            |
| Antimicrobial chemicals <sup>c</sup>  | 12  | Triclosan (TCS) and triclocarban (TCC); parabens: methyl paraben (MP), ethyl paraben (EP), propyl paraben (PP), butyl paraben (BP), benzyl paraben (BzP), heptyl paraben (HP), 4-hydroxy benzoic acid (4-HB), 3,4-dihydroxy benzoic (3,4-DHB), methyl-protocatechuic acid (OH-Me-P), and ethyl-protocatechuic acid (OH-Et-P)                                                                                                                                                                                                                 | Urine  | 0.02-0.05 ng/mL            |
| Paracetamol & derivatives             | 2   | Paracetamol and 4-aminophenol                                                                                                                                                                                                                                                                                                                                                                                                                                                                                                                | Urine  | 0.5 ng/mL and 0.25 ng/mL   |
| Blood metals                          | 3   | Cadmium (Cd), lead (Pb), and mercury (Hg)                                                                                                                                                                                                                                                                                                                                                                                                                                                                                                    |        | 10 ng/L to 10 $\mu$ g/L    |
| Cotinine <sup>d</sup>                 | 1   | Cotinine                                                                                                                                                                                                                                                                                                                                                                                                                                                                                                                                     | Serum  | 0.01 ng/mL                 |
| Urine metals                          | 17  | Manganese (Mn), chromium (Cr), beryllium (Be), cobalt (Co), molybdenum (Mo), cadmium (Cd), tin (Sn), caesium (Cs), barium (Ba), nickel (Ni), copper (Cu), zinc (Zn), tungsten (W), platinum (Pt), thallium (Tl), lead (Pb), and uranium (U)                                                                                                                                                                                                                                                                                                  | Urine  | 10 ng/L to 10 $\mu$ g/L    |
| Urine metalloids                      | 4   | Selenium (Se), arsenic (As), antimony (Sb), and tellurium (Te)                                                                                                                                                                                                                                                                                                                                                                                                                                                                               | Urine  | 10 ng/L to 10 $\mu$ g/L    |

568 <sup>a</sup>Polybrominated chemicals contain mostly PBDEs with one PBB.  
569 <sup>b</sup>Phenols contain mostly benzophenones with one BPA.  
570 <sup>c</sup>Antimicrobial chemicals contain mostly parabens with TCS and TCC.  
571 <sup>d</sup>Serum cotinine is not an EDC but included for comprehensive investigation.  
572  
573



574 Table 2. Sociodemographic and lifestyle characteristics of females and males in the LIFE Study.

| Characteristics                                  | Females ( <i>n</i> = 501) | Males ( <i>n</i> = 501) |
|--------------------------------------------------|---------------------------|-------------------------|
| Age (year) **                                    | 29.99 ± 4.14              | 31.77 ± 4.92            |
| BMI (kg/m <sup>2</sup> ) **                      |                           |                         |
| < 25                                             | 230 (46)                  | 84 (17)                 |
| ≥ 25 & < 30                                      | 136 (27)                  | 206 (41)                |
| ≥ 30                                             | 135 (27)                  | 311 (62)                |
| Non-Hispanic White                               | 396 (79)                  | 397 (79)                |
| College graduate or higher *                     | 474 (95)                  | 457 (91)                |
| Yearly income \$80,000 or over                   | 297 (59)                  | 298 (59)                |
| Regular vigorous exercise in the past 12 months  | 200 (40)                  | 211 (42)                |
| Smoke at the time of study                       |                           |                         |
| No                                               | 445 (89)                  | 440 (88)                |
| Yes (No. of cigarettes on a typical day)         |                           |                         |
| 1 - 3                                            | 19 (4)                    | 26 (5)                  |
| 4 - 6                                            | 8 (2)                     | 11 (2)                  |
| 7 - 10                                           | 15 (3)                    | 8 (2)                   |
| 11-15                                            | 7 (1)                     | 2 (0)                   |
| 16 - 25                                          | 3 (1)                     | 10 (2)                  |
| > 25                                             | 4 (1)                     | 4 (1)                   |
| ≥ 12 alcoholic drinks in the past 12 months **   | 374 (75)                  | 428 (85)                |
| No. of alcoholic drinks on a typical occasion ** |                           |                         |
| 0                                                | 128 (26)                  | 73 (15)                 |
| 1                                                | 108 (22)                  | 63 (13)                 |
| 2                                                | 169 (34)                  | 150 (30)                |
| 3                                                | 68 (14)                   | 99 (20)                 |
| 4                                                | 19 (4)                    | 62 (12)                 |
| 5                                                | 9 (2)                     | 54 (11)                 |
| History of diabetes                              | 6 (1)                     | 14 (3)                  |
| History of high blood pressure **                | 20 (4)                    | 52 (10)                 |
| History of high cholesterol **                   | 41 (8)                    | 78 (16)                 |
| Serum cotinine (ng/mL) <sup>a</sup> **           | 0.62 ± 0.23               | 1.24 ± 2.17             |
| Serum total lipids (mg/dL) <sup>a</sup> **       | 2.00 ± 0.03               | 6.56 ± 0.26             |
| Urinary creatinine (mg/dL) <sup>a</sup> **       | 4.22 ± 0.86               | 4.76 ± 0.73             |

575

576 Note: BMI, body mass index. Values in mean ± SD or *n* (%).

577 \**p* < 0.05; \*\**p* < 0.01.

578 <sup>a</sup>log+1 transformed values.

579

580

581

582 Table 3. Number of effective variables for each chemical class after adjusting for the within-class correlation.

| Chemical class                           | Females |                  |                   |         | Males            |                   |         |
|------------------------------------------|---------|------------------|-------------------|---------|------------------|-------------------|---------|
|                                          | M       | M <sub>eff</sub> | M <sub>diff</sub> | P value | M <sub>eff</sub> | M <sub>diff</sub> | P value |
| Serum persistent organic compounds       |         |                  |                   |         |                  |                   |         |
| Polychlorinated biphenyls (PCBs)         | 36      | 28.38            | 7.62              | 0.002   | 28.69            | 7.31              | 0.002   |
| Organochlorine pesticides (OCPs)         | 9       | 7.94             | 1.06              | 0.006   | 8.17             | 0.83              | 0.006   |
| Polybrominated chemicals                 | 11      | 8.22             | 2.78              | 0.006   | 8.38             | 2.62              | 0.006   |
| Polyfluoroalkyl substances (PFASs)       | 7       | 6.13             | 0.87              | 0.008   | 6.25             | 0.75              | 0.008   |
| Urinary non-persistent organic compounds |         |                  |                   |         |                  |                   |         |
| Phytoestrogens                           | 6       | 5.34             | 0.66              | 0.009   | 5.38             | 0.62              | 0.009   |
| Phthalate metabolites                    | 14      | 12.72            | 1.28              | 0.004   | 12.87            | 1.13              | 0.004   |
| Phenols                                  | 6       | 5.48             | 0.52              | 0.009   | 5.51             | 0.49              | 0.009   |
| Antimicrobial chemicals                  | 12      | 11.38            | 0.62              | 0.004   | 11.60            | 0.40              | 0.004   |
| Paracetamol & derivatives                | 2       | 1.99             | 0.01              | 0.025   | 2.00             | 0.00              | 0.025   |
| Others                                   |         |                  |                   |         |                  |                   |         |
| Blood metals                             | 3       | 2.91             | 0.09              | 0.017   | 2.91             | 0.09              | 0.017   |
| Serum cotinine                           | 1       | 1.00             | 0.00              | 0.050   | 1.00             | 0.00              | 0.050   |
| Urine metals                             | 17      | 16.13            | 0.87              | 0.003   | 16.22            | 0.78              | 0.003   |
| Urine metalloids                         | 4       | 3.95             | 0.05              | 0.013   | 3.95             | 0.05              | 0.013   |
| Total                                    | 128     | 111.57           | 16.43             | 0.0004  | 112.94           | 15.06             | 0.0004  |

583

584 Note: M, number of variables in the corresponding chemical classes; M<sub>eff</sub>, number of effective variables after taking account of  
 585 within-class correlation; M<sub>diff</sub>, the different between M and M<sub>eff</sub>; P value, Bonferroni adjusted p values as 0.05/M<sub>eff</sub>.

586

587

588

589 Table 4. Correlations of chemical relatedness between 2003–2004 NHANES and current study by different chemical classes.

| Chemical class <sup>a</sup> | Females          |          | Males            |          | Couples          |          |
|-----------------------------|------------------|----------|------------------|----------|------------------|----------|
|                             | Pearson <i>r</i> | <i>n</i> | Pearson <i>r</i> | <i>n</i> | Pearson <i>r</i> | <i>n</i> |
| Blood_metals                | 0.07             | 3        | 0.13             | 3        | -0.04            | 6        |
| OCPs                        | 0.69             | 36       | 0.51             | 36       | 0.25             | 72       |
| PCBs                        | 0.88             | 561      | 0.88             | 561      | 0.77             | 1122     |
| PFASs                       | 0.31             | 21       | 0.29             | 21       | 0.32             | 42       |
| Phthalates                  | 0.90             | 78       | 0.89             | 78       | 0.34             | 156      |
| Phytoestrogens              | 0.98             | 15       | 0.97             | 15       | 0.86             | 30       |
| Polybrominated_cpds         | 0.76             | 55       | 0.74             | 55       | 0.77             | 110      |
| Urine_metalloids            | 0.41             | 3        | -0.78            | 3        | 0.34             | 6        |
| Urine_metals                | 0.82             | 55       | 0.78             | 55       | -0.01            | 110      |
| Total                       | 0.84             | 827      | 0.84             | 827      | 0.67             | 1654     |

590

591 Note: Pearson *r*, Pearson correlation coefficients of the chemical relatedness (spearman correlations of chemicals) between National  
 592 Health and Nutrition Examination Survey (NHANES) and this study; *n*, sample size.

593 <sup>a</sup>Only 9 classes are shown because not all chemicals in 13 chemical classes in this study could be matched with NHANES.

594

595 Figure Legends

596 Figure 1. Analytical scheme to investigate the variability and correlations in this study. A) We first extract the residuals from a linear  
597 model after adjusting for the base covariates (total lipids or creatinine) to calculate the effective number of variables ( $M_{\text{eff}}$ ) and  
598 Spearman's rank correlation ( $r_s$ ). B) Then, we used another linear model with an additional age variable to obtain residuals and  
599 conducted paired t-test to test the difference of biomarkers between females and males living in the same household. C) Afterward,  
600 we further adjusted for sex prior to extracting residuals to calculate the percentage of biomarker variance explained by the shared  
601 environment.

602  
603 Figure 2. Summary of the percentage variance explained by the shared environment. Boxplots of the adjusted coefficient of  
604 determination ( $R^2$ ) within different chemical classes are shown. Interquartile range is not shown for cotinine class because it  
605 contains only 1 compound. For each box, median and interquartile range are drawn and the whiskers are extended to the largest  
606 values within 1.5\*interquartile range. Black dots denote correlations outside of the range covered by the whiskers.

607  
608 Figure 3. Exposome correlation globe showing the relationships of biomarkers between females, males and couples. Right-half  
609 represents biomarkers in females; left-half represents biomarkers in males. Only Spearman's rank correlations greater than 0.25 and  
610 smaller than -0.25 were shown as connections in the globe. Red line denotes positive correlation and dark green line denotes  
611 negative one. Color intensity and line width are proportional to the size of the correlation. Within-class and between-class  
612 correlations are shown outside and inside of the track respectively. Correlations in couples are indicated by the lines linking females  
613 and males (i.e. crossing the vertical-half of the globe).

614  
615 Figure 4. Boxplots of Spearman's rank correlations ( $r_s$ ) within different chemical classes. A) Females; B) Males; and C) Couples. For  
616 couples, summary statistics were estimated with the full 128 x 128 correlation matrix instead of with the half triangle. Certain  
617 classes contain only 1 pair of correlation (paracetamols in females, paracetamols in males, and cotinine in couples). "All" represents  
618 the grouping by the correlation of all pairs of chemicals available. Horizontal line drawn across the chemical classes is equal to the  
619 95<sup>th</sup> percentile of the null distribution obtained from permuting the concentrations of all chemicals. Definition of whisker and black  
620 dot can be referred to the caption in Figure 2.

621

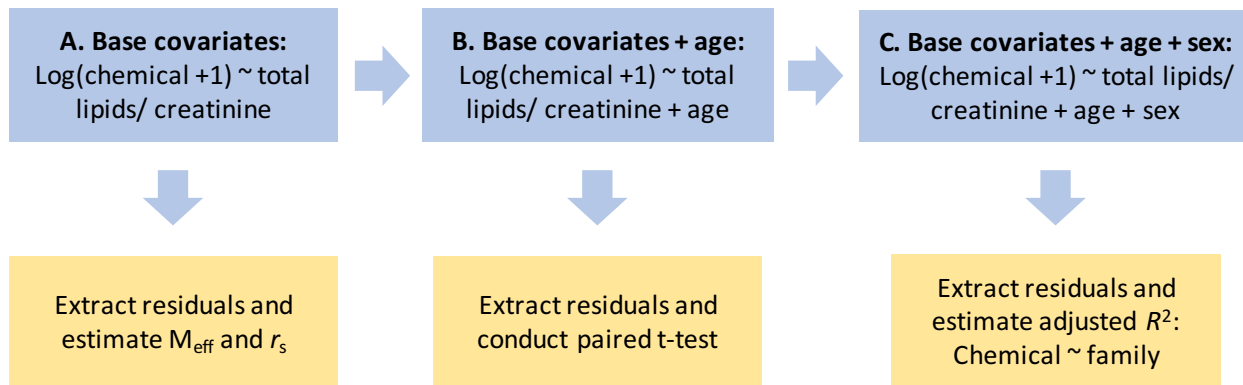

622  
623  
624

Figure 1

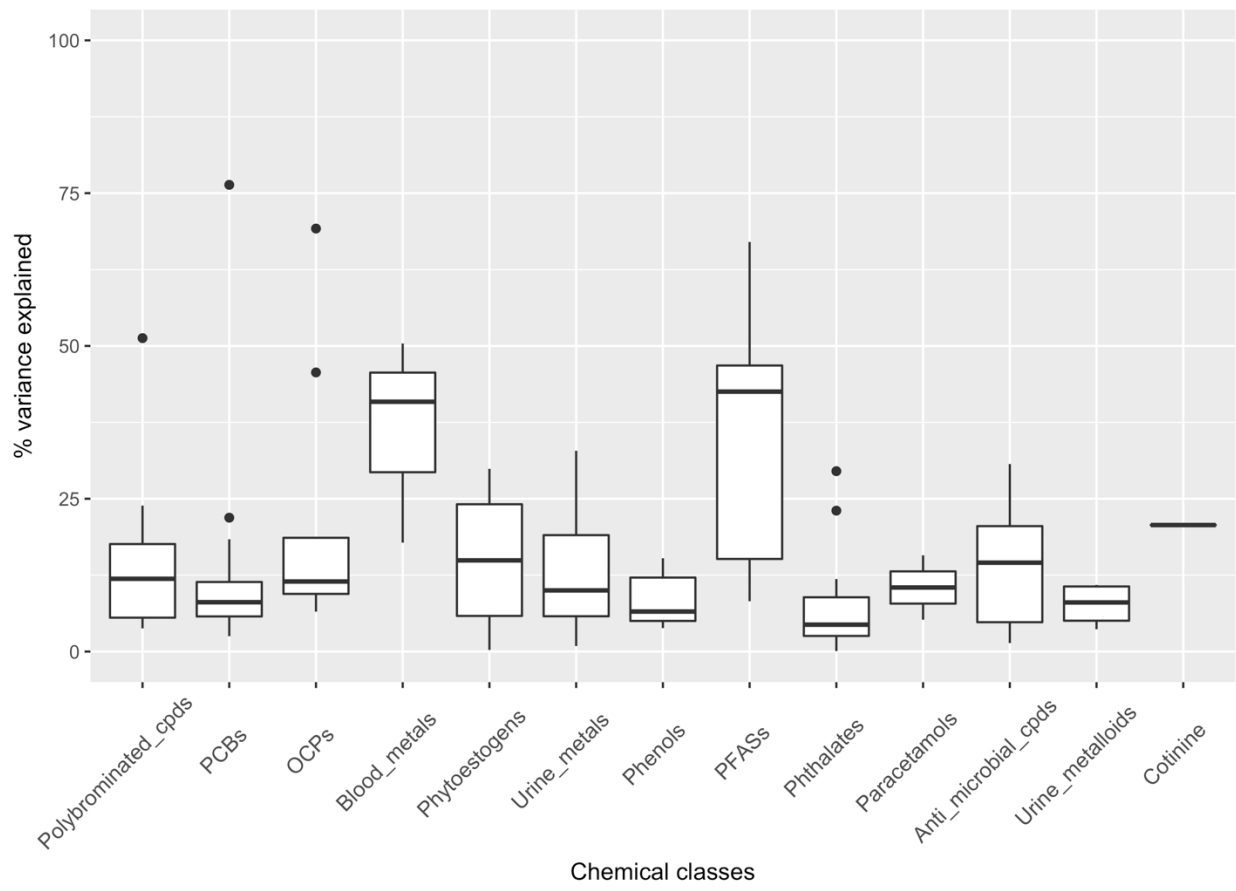

625  
626  
627

Figure 2

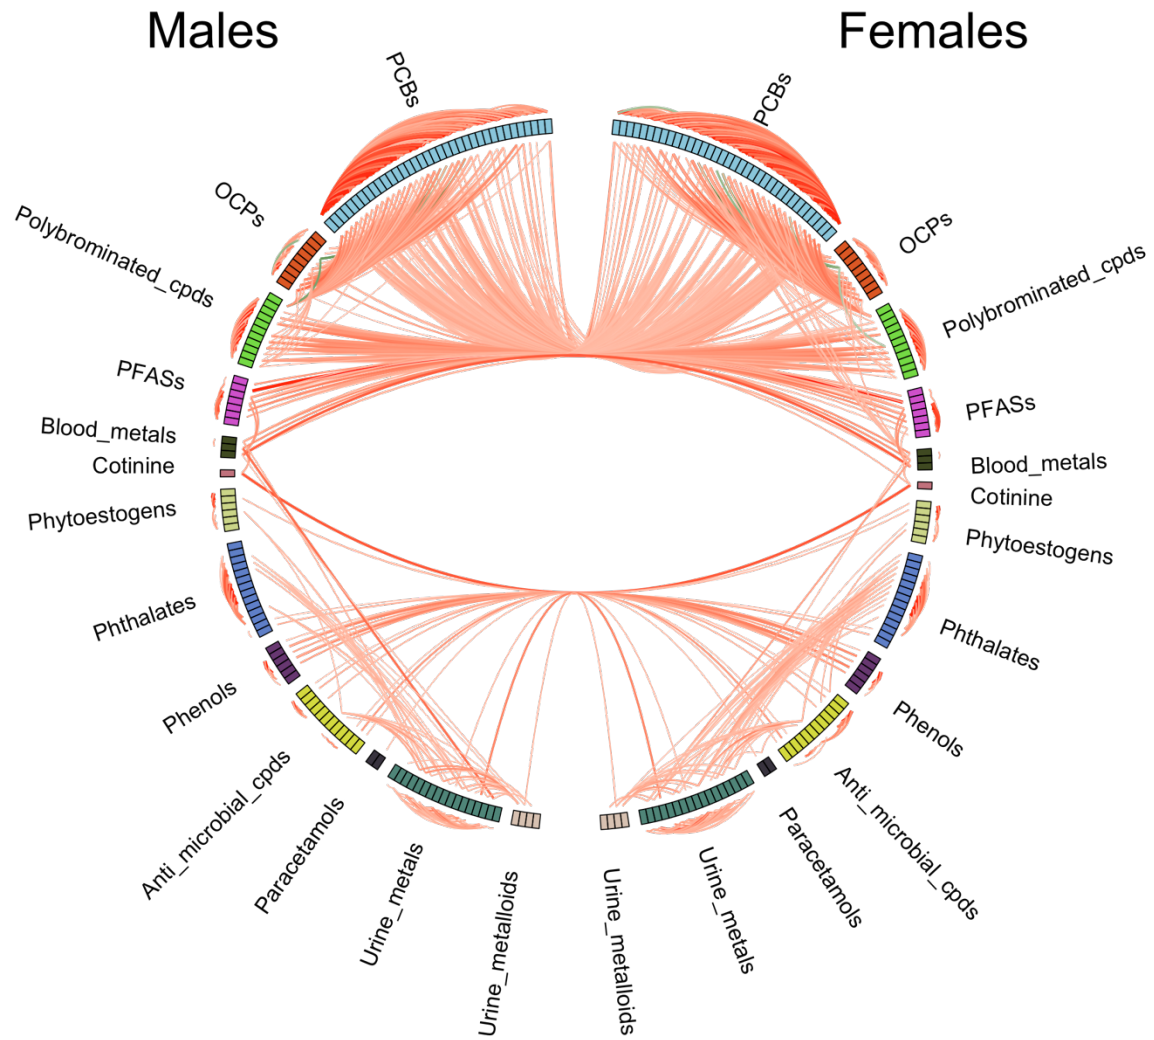

628  
 629 Figure 3  
 630

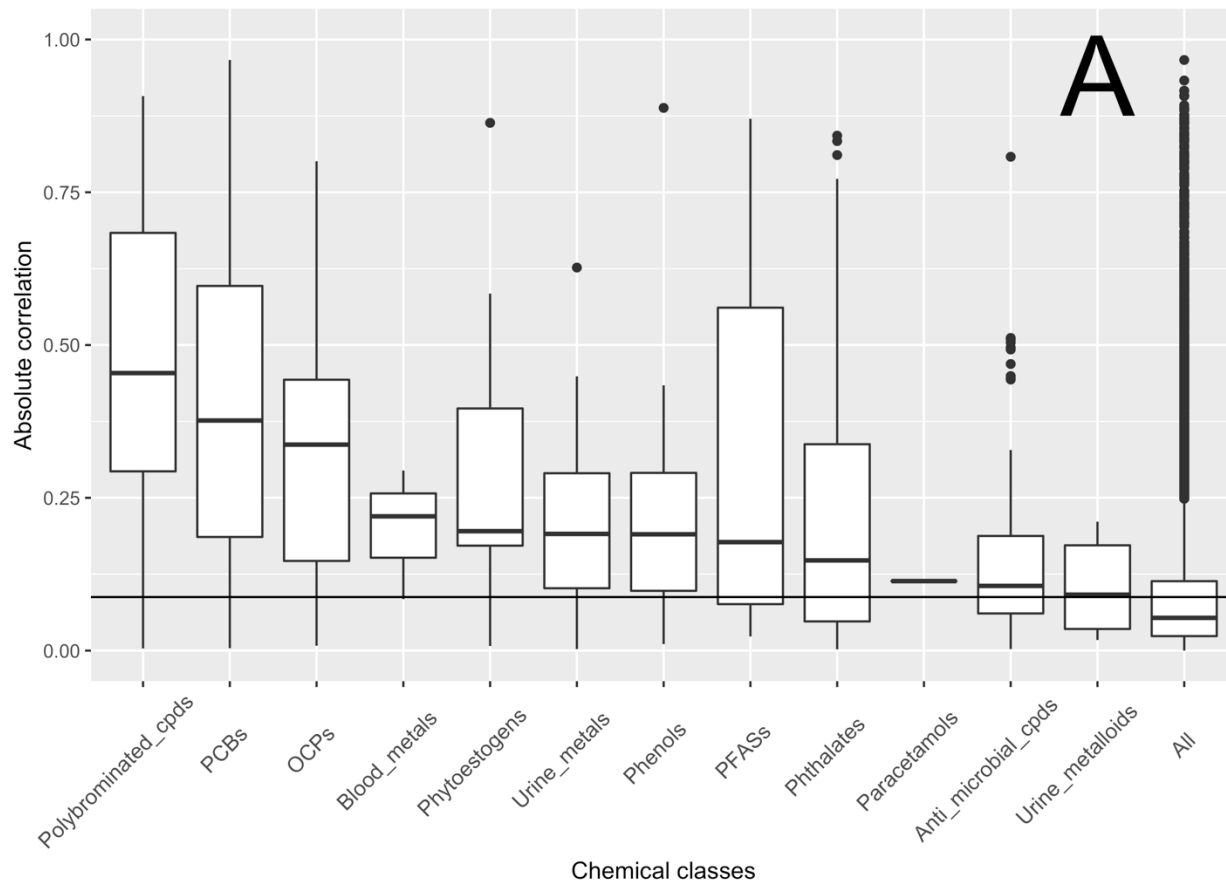

631  
632



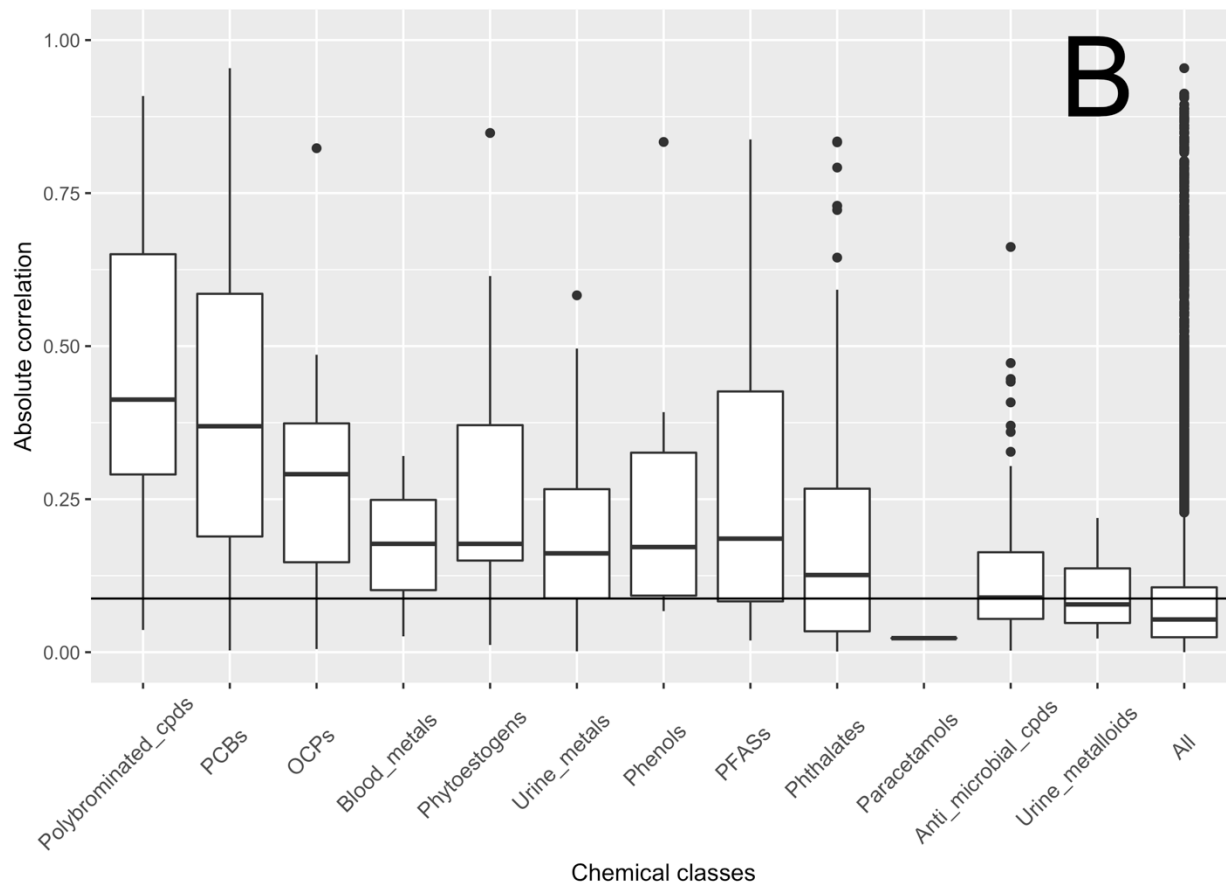

633  
634

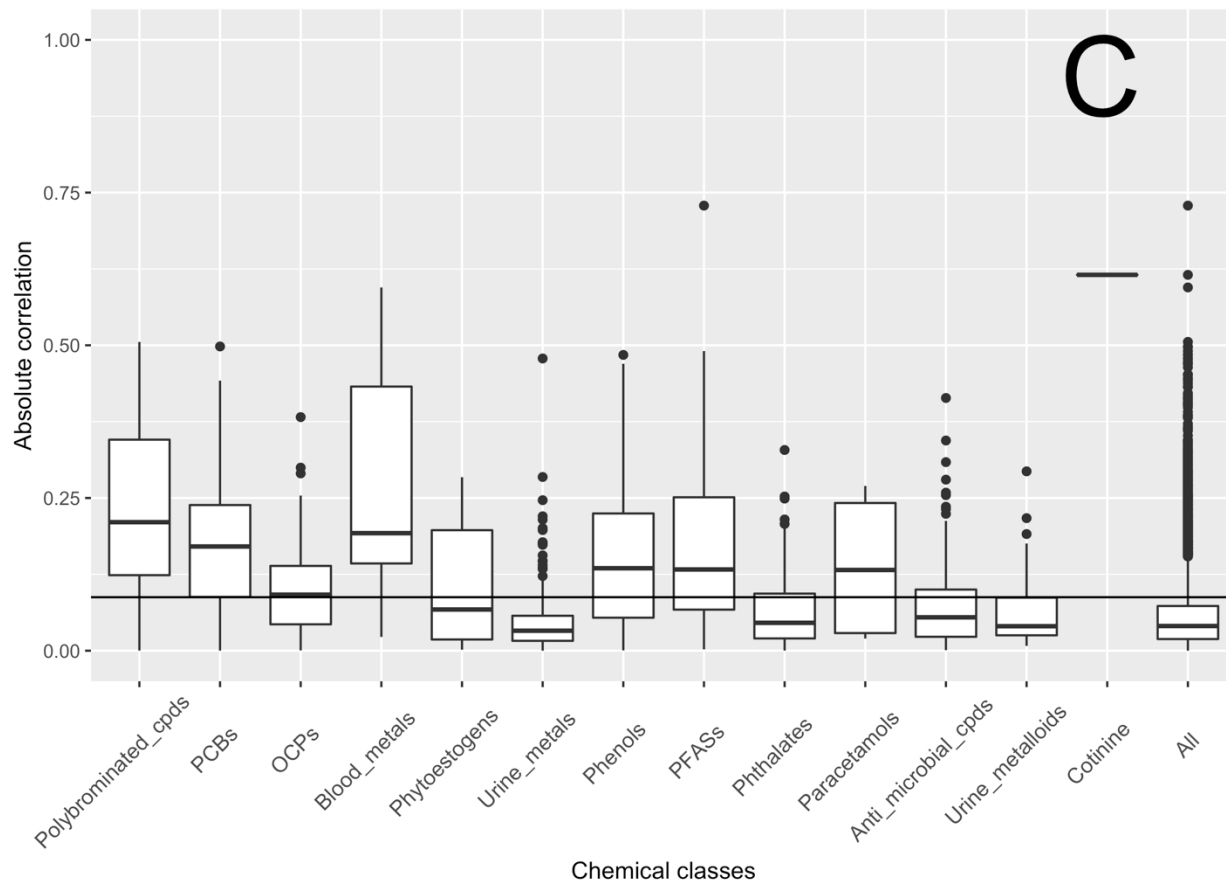

635  
636  
637

Figure 4
